# Supplementary material for: Species comparison of liver proteomes reveals links to naked mole-rat longevity and human aging
Source: PubMed Central journal article supplement (PMC6090990; doi:10.1186/s12915-018-0547-y), 2018-08-02

### SULT1C2

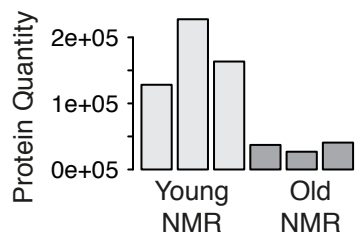

Supplement: 12915_2018_547_MOESM11_ESM.pdf [file 12915_2018_547_MOESM11_ESM.pdf]
